# Supplementary material for: Selective ATM inhibition augments radiation-induced inflammatory signaling and cancer cell death
Source: publisher site journal article supplement (doi:10.18632/aging.204487), 2023-01-17
Supplement: Supplementary file [file aging-v15i2-204487-supplementary-material-SD1.pdf]

## SUPPLEMENTARY INFORMATION

### Supplementary information appendix

#### *TaqMan probes*

Human GAPDH (Hs02786624\_g1), IFNB1 (Hs01077958\_s1), IFIT1 (Hs03027069\_s1), IFIT2 (Hs01922738\_s1), IFITM1 (Hs00705137\_s1), IFI27 (Hs01086373\_g1), ISG15 (Hs01921425\_s1), MX1 (Hs00895608\_m1), IL6 (Hs00174131\_m1),

IL8(Hs00174103\_m1), IL1A (Hs00174092\_m1), IL1B (Hs01555410\_m1), CCL2 (Hs00234140\_m1), CCL5 (Hs00982282\_m1), CXCL10 (Hs00171042\_m1), CXCL11 (Hs00171138\_m1), TNF (Hs00174128\_m1), CD274 (PD-L1, Hs00204257\_m1), MICA (Hs00792195\_m1), MICB (Hs00792952\_m1), ULBP1 (Hs00360941\_m1), ULBP2 (Hs01127964\_m1), PVR (CD155, Hs00197846\_m1), ICAM1 (Hs00164932\_m1).
